# Supplementary material for: Reciprocal hybridization of MoO2 nanoparticles and few-layer MoS2 for stable lithium-ion batteries
Source: Royal Society of Chemistry journal article supplement (doi:10.1039/c5cc05069c), 2015-01-01
Supplement: c5cc05069c1.pdf [file c5cc05069c1.pdf]

## **Supporting Information**

### **Reciprocal hybridization of MoO<sub>2</sub> nanoparticles and few-layer MoS<sub>2</sub> for stable lithium-ion batteries**

Zongnan Deng,<sup>a</sup> Yanjie Hu,<sup>a</sup> Dayong Ren,<sup>a</sup> Shaoliang Lin,<sup>b</sup> Hao Jiang,<sup>\*a</sup> and Chunzhong Li<sup>\*a</sup>

a Key Laboratory for Ultrafine Materials of Ministry of Education, School of Materials Science and Engineering, East China University of Science and Technology, Shanghai 200237, China; E-mail: jianghao@ecust.edu.cn (H. Jiang) and czli@ecust.edu.cn (C. Z. Li)  
Fax: +86-21-64250624; Tel: +86-21-64250949

b Key Laboratory of Advanced Polymeric Materials, School of Materials Science and Engineering, East China University of Science and Technology, Shanghai 200237, China;

### **Experimental section**

Synthesis of MoS<sub>2</sub> nanosheets: Typically, 0.15g of sodium molybdate (Na<sub>2</sub>MoO<sub>4</sub>·2H<sub>2</sub>O) and 0.3g of thioacetamide (C<sub>2</sub>H<sub>5</sub>NS) were dissolved into 30 mL of deionized (DI) water with magnetic stirring, and the suspension was transferred into 50 ml Teflon-lined stainless steel autoclave and maintained at 220 °C for 24 hours. The precipitates were collected by centrifuge, washed with DI water and ethanol, and re-dispersed into 20ml aqueous solution for subsequent experiments.

Synthesis of MoO<sub>2</sub>/MoS<sub>2</sub> hybrids: 0.3 g of molybdenum trioxide (MoO<sub>3</sub>) and 10 mL of ethylene glycol were added into the MoS<sub>2</sub> nanosheets aqueous solution above-mentioned with magnetic stirring, and the suspension was transferred into a 50 mL Telfon-lined stainless steel

autoclave, and hydrothermally treated in an air-flow electric oven at 200 °C for 24 hours. The obtained black precipitates were collected using centrifuge, washed several times with DI water and ethanol, and freeze-dried in vacuum environment.

Synthesis of MoO<sub>2</sub> nanoparticles: 0.3 g of molybdenum trioxide (MoO<sub>3</sub>) and 10 mL of ethylene glycol were added into 20 mL of DI water with magnetic stirring for 30 min, and the suspension was transferred into a 50 mL Teflon-lined stainless steel autoclave, and hydrothermally treated in an air-flow electric oven at 200 °C for 24 hours. The obtained black precipitates were collected using centrifuge, washed several times with DI water and ethanol, and freeze-dried in vacuum environment.

## **Characterization**

XRD pattern was carried out on a X-ray diffraction (Bruker D2 Phase Table-top Diffractometer) with Cu-K $\alpha$  radiation ( $\lambda = 1.5418 \text{ \AA}$ ) at 30 mV and 10 mA. Microstructural properties were determined by transmission electron microscopy (TEM, JEOL JEM-2010). Raman measurement was performed with a Renishaw 2000 system with a 514.5 nm Ar-ion laser and charge-coupled device detector. The porous properties were analyzed using nitrogen adsorption and desorption isotherms that were obtained using the surface area and a porosimetry analyzer (ASPA 2010) at 77K. The specific surface areas were calculated according to the BET theory. PSD was calculated via BJH method.

## **Electrochemical measurements**

Electrochemical measurements were conducted by galvanostatic testing CR2016-type

coin cells assembled in an argon filled glove box (Mbraum). To prepare the working electrode, mix the active material, carbon black and polyvinyl difluoride (PVDF) in a weight ratio of 70:20:10, and then disperse the mixture in N-methyl-2-pyrrolidinone (NMP) to form uniform slurry which was cast on the Cu foil. The foil loaded with active materials was then dried at 120 °C for 12 h to remove the excess solvent. Pure lithium foil and polypropylene (Celgard 2400) were used as counter electrode and separator, respectively. The electrolyte was composed of 1.0 M  $\text{LiPF}_6$  in a mixture of ethylene carbonate and diethyl carbonate (EC-DEC) (volume ratio = 1: 1). The galvanostatic charge-discharge cycling at different current rates was performed on an automatic battery testing system (LAND CT2001A model) in a voltage range of 0.01–3.0 V (vs.  $\text{Li/Li}^+$ ) at room temperature. The cyclic voltammetry (CV) experiments were carried out on a multichannel electrochemical station (Autolab PGSTAT302N).

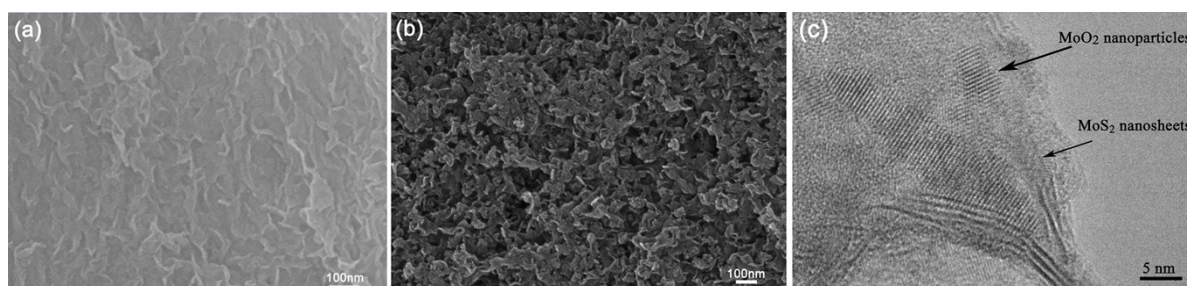

Fig. S1 (a) SEM image of  $\text{MoS}_2$  nanosheets; (b) SEM image and (c) high-magnification TEM image of  $\text{MoO}_2/\text{MoS}_2$  hybrids.

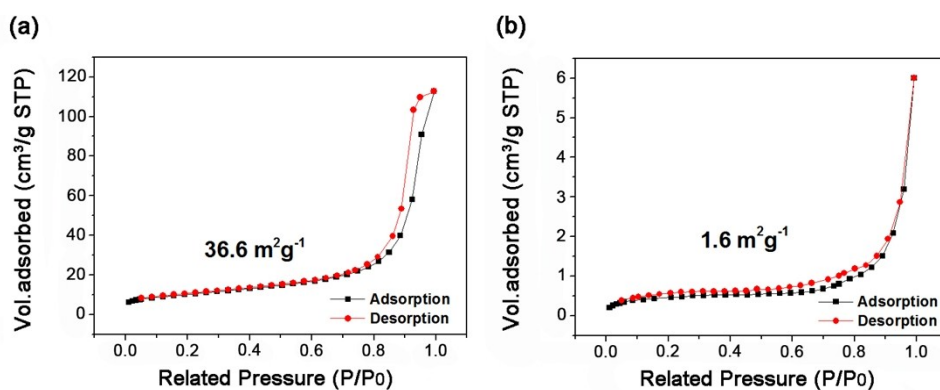

Fig. S2 N<sub>2</sub> adsorption-desorption isotherms of (a) MoO<sub>2</sub> nanoparticles; (b) MoS<sub>2</sub> nanosheets.

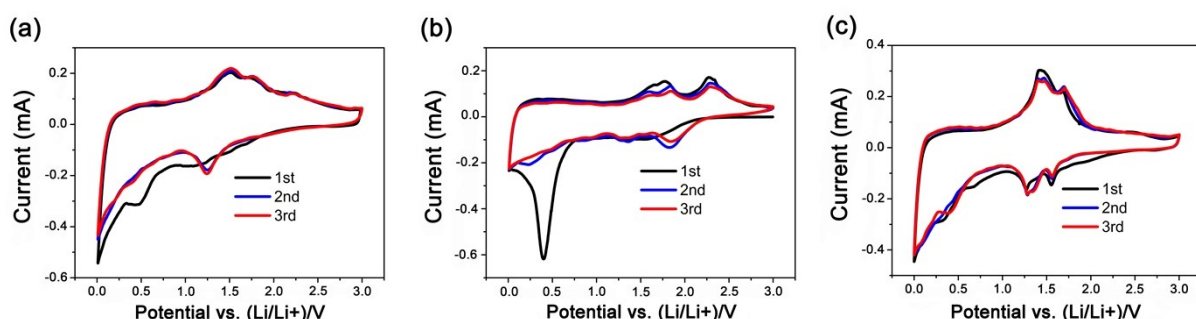

Fig. S3 CVs at a scan rate of 0.1 mV s<sup>-1</sup> for the first three cycles of (a) MoO<sub>2</sub>/MoS<sub>2</sub> hybrids; (b) MoS<sub>2</sub> nanosheets; (c) MoO<sub>2</sub> nanoparticles.

The first three cyclic voltammograms (CVs) of the MoO<sub>2</sub>/MoS<sub>2</sub> hybrids, the MoS<sub>2</sub> nanosheets and the MoO<sub>2</sub> nanoparticles at 0.1 mV s<sup>-1</sup> within a potential range of 0.01-3.0 V are shown in Figure S3. During the first cycle, an overlap reduction peak from 1.7 V to 1.0 V is assigned to monoclinic-orthorhombic-monoclinic phase transitions of MoO<sub>2</sub>.<sup>1</sup> The reduction peak at 0.75~0.4 V corresponds to the intercalation of Li<sup>+</sup> into MoS<sub>2</sub> lattice to form Li<sub>x</sub>MoS<sub>2</sub> and the the formation of Li<sub>2</sub>S according to Li<sub>x</sub>MoS<sub>2</sub> → Mo + xLi<sub>2</sub>S.<sup>2</sup> In the reverse anodic scan, two pronounced peaks at 1.5 V and 1.75 V can be ascribed to the phase transitions between the monoclinic phase and the orthorhombic phase in partially lithiated Li<sub>x</sub>MoO<sub>2</sub>,<sup>3</sup> and the peak at 2.25 V can be attributed to the delithiation of Li<sub>2</sub>S. In the

subsequent cycles, the oxidation-reduction peak become more obvious which is very similar to previously reported.<sup>4,5</sup>

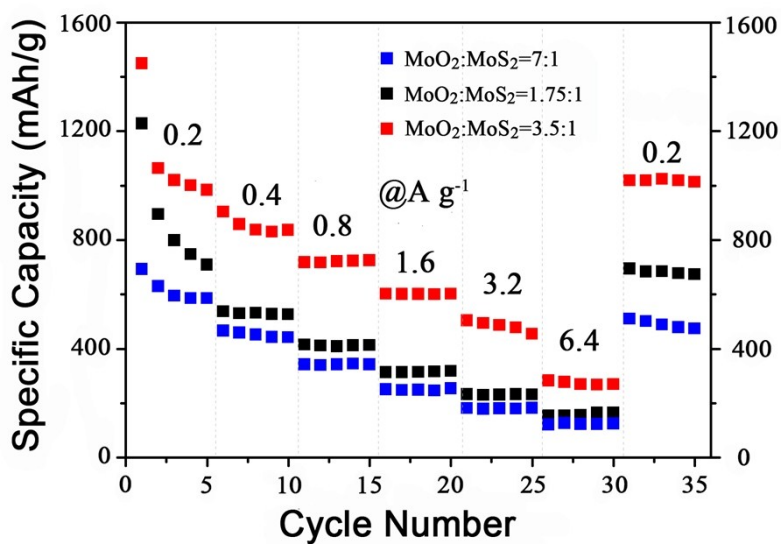

Fig. S4 The rate performances of MoO<sub>2</sub>/MoS<sub>2</sub> hybrids with different component ratios.

## Reference

- 1 B. K. Guo, X. P. Fang, B. Li, Y. F. Shi, C. Y. Ouyang, Y. S. Hu, Z. X. Wang, G. D. Stucky and L. Q. Chen, *Chem. Mater.*, 2012, **24**, 457-463.
- 2 H. Hwang, H. Kim and J. Cho, *Nano Lett.*, 2011, **11**, 4826-4830.
- 3 J. Liu, S. S. Tang, Y. K. Lu, G. M. Cai, S. Q. Liang, W. J. Wang and X. L. Chen, *Energy Environ. Sci.*, 2013, **6**, 2691-2697.
- 4 M. J. Hwang, K. M. Kim and K. S. Ryu, *J. Electroceram*, 2014, **33**, 239-245.
- 5 L. X. Zeng, C. Zheng, C. L. Deng, X. K. Ding and M. D. Wei, *Acs. Appl. Mater. Inter.*, 2013, **5**, 2182-2187.
